# Supplementary material
Source: Springer Nature journal article supplement (https://www.springermedizin.de/resource/supplementary/13048_2012_117_MOESM3_ESM.pdf/9664918)

**A****PR-B**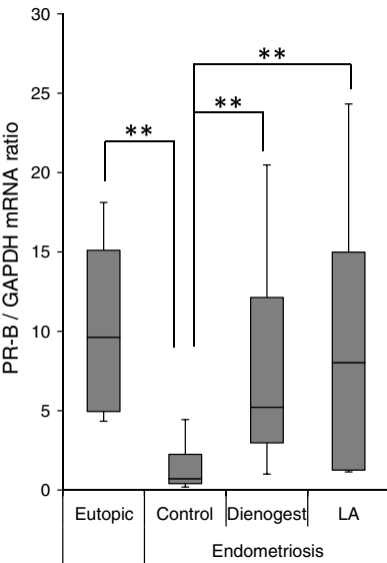**B****PR-A**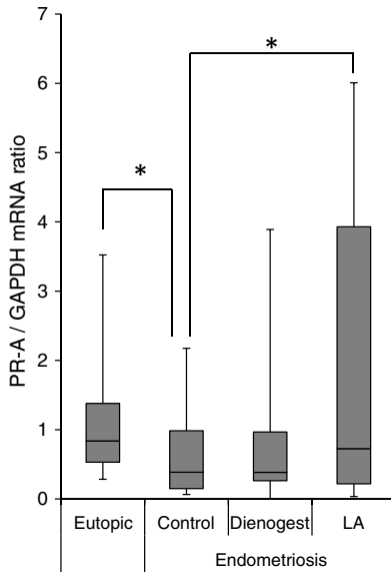**C****PR-B/PR-A**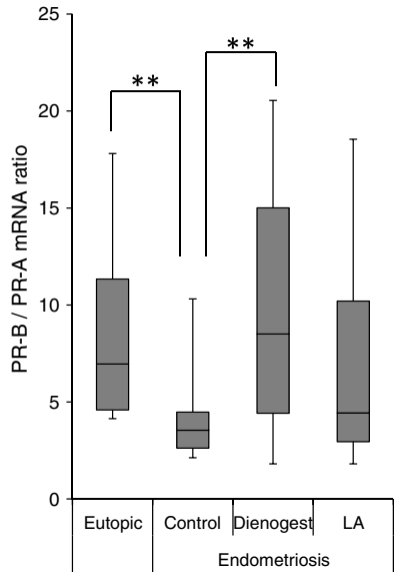

Supplement: MOESM3 [file 9664918]
